# Supplementary material for: Ca(OH)2-mediated activation of peroxymonosulfate for the degradation of bisphenol S
Source: Royal Society of Chemistry journal article supplement (doi:10.1039/d1ra05286a), 2021-01-01
Supplement: d1ra05286a1.pdf [file d1ra05286a1.pdf]

## Supplementary material

### **Ca(OH)<sub>2</sub>-mediated activation of peroxymonosulfate for the degradation of bisphenol S**

Leliang Wu<sup>a</sup>, Yiting Lin<sup>a</sup>, Yimin Zhang<sup>a</sup>, Peng Wang<sup>a</sup>, Mingjun Ding<sup>a</sup>, Minghua Nie\*

<sup>a b</sup> and Caixia Yan\*<sup>a</sup>

<sup>a</sup> School of Geography and Environment, Key Laboratory of Poyang Lake Wetland and Watershed Research, Ministry of Education, Jiangxi Normal University, Nanchang 330022, China

<sup>b</sup> Key Laboratory of Eco-geochemistry, Ministry of Natural Resource, Beijing 100037, China

\* Corresponding author email: [mhnie@jxnu.edu.cn](mailto:mhnie@jxnu.edu.cn) (M. Nie); [wysycx@foxmail.com](mailto:wysycx@foxmail.com)

(C. Yan)

**Table S1.** Basic physical and chemical characteristics of different water matrices and removal of ACE in these matrices.

| Water matrixes  | Degradation of BPS (%) | Cl <sup>-</sup> (mg•L <sup>-1</sup> ) | F <sup>-</sup> (mg•L <sup>-1</sup> ) | NO <sub>2</sub> <sup>-</sup> (mg•L <sup>-1</sup> ) | SO <sub>4</sub> <sup>2-</sup> (mg•L <sup>-1</sup> ) | NO <sub>3</sub> <sup>-</sup> (mg•L <sup>-1</sup> ) | <i>k</i> <sub>obs</sub> (min <sup>-1</sup> ) | Half-life <sup>a</sup> (min) | <i>R</i> <sup>2</sup> |
|-----------------|------------------------|---------------------------------------|--------------------------------------|----------------------------------------------------|-----------------------------------------------------|----------------------------------------------------|----------------------------------------------|------------------------------|-----------------------|
| Ultrapure water | 100                    | n.d. <sup>b</sup>                     | n.d.                                 | n.d.                                               | n.d.                                                | n.d.                                               | 0.2010                                       | 4.595195                     | 0.995                 |
| River water     | 85.03                  | 16.4728                               | 1.3848                               | n.d.                                               | 33.4097                                             | 14.1677                                            | 0.0829                                       | 6.366535                     | 0.997                 |
| Lake water      | 81.47                  | 13.3090                               | 0.7952                               | n.d.                                               | 15.7176                                             | 6.2020                                             | 0.0729                                       | 6.623628                     | 0.997                 |
| Domestic water  | 77.94                  | 15.1818                               | 0.8712                               | 0.3201                                             | 15.7535                                             | 8.5110                                             | 0.0626                                       | 6.928274                     | 9.996                 |

<sup>a</sup> Calculated from the pseudo-first order kinetics law where  $1 / (2t) = \ln 2 / k_{obs}$ .

<sup>b</sup> n.d.: not detected

**Table S2.** Detail information of HPLC analysis.

| Compounds | Mobile phase and proportion (%)                 | Flow rate (mL•min <sup>-1</sup> ) | Detector | Detection wavelength (nm)                                  | Temperature of column incubator (°C) | Injection volume (μl) |
|-----------|-------------------------------------------------|-----------------------------------|----------|------------------------------------------------------------|--------------------------------------|-----------------------|
| BPA       | Water: Methanol<br>20: 80                       | 0.2                               | DAD      | 220                                                        | 40                                   | 2                     |
| BPS       | Water: Methanol<br>40: 60                       | 0.2                               | DAD      | 258                                                        | 40                                   | 2                     |
| FFA       | Methanol: Trifluoroacetic acid (0.5‰)<br>30: 70 | 0.2                               | DAD      | 214                                                        | 40                                   | 2                     |
| TAP       | Methanol: Trifluoroacetic acid (0.5‰)<br>25: 75 | 0.3                               | FLD      | $\lambda_{\text{ex}} = 224$<br>$\lambda_{\text{em}} = 290$ | 40                                   | 2                     |
| NOF       | Methanol: Trifluoroacetic acid (0.5‰)<br>25: 75 | 0.3                               | FLD      | $\lambda_{\text{ex}} = 278$<br>$\lambda_{\text{em}} = 445$ | 40                                   | 2                     |
| ENR       | Methanol: Trifluoroacetic acid (0.5‰)<br>28: 72 | 0.3                               | FLD      | $\lambda_{\text{ex}} = 280$<br>$\lambda_{\text{em}} = 450$ | 40                                   | 2                     |
| LOM       | Methanol: Trifluoroacetic acid (0.5‰)<br>30: 70 | 0.3                               | FLD      | $\lambda_{\text{ex}} = 338$<br>$\lambda_{\text{em}} = 425$ | 40                                   | 2                     |

**Table S3.** Removal of BPS by Ca(OH)<sub>2</sub>/PMS system in the presence of various substances. Experiment conditions: [BPS]<sub>0</sub> = 20 μm, [PMS]<sub>0</sub> = 1.5 mM, [Ca(OH)<sub>2</sub>]<sub>0</sub> = 1 mM, [substances]<sub>0</sub> = 0-10 mM, [HA]<sub>0</sub> = 0-50 mg•L<sup>-1</sup>.

| Coexisting                    | Concentrations        | Removal of | $k_{obs}$             | $R^2$ | Initial-final |
|-------------------------------|-----------------------|------------|-----------------------|-------|---------------|
| No addition                   | -                     | 100%       | $2.01 \times 10^{-2}$ | 0.995 | 9.83-7.03     |
| Cl <sup>-</sup>               | 1 mM                  | 98.01      | $1.57 \times 10^{-2}$ | 0.963 | 10.77-9.17    |
|                               | 5 mM                  | 100        | $2.53 \times 10^{-2}$ | 0.900 | 10.82-9.09    |
|                               | 10 mM                 | 100        | $2.78 \times 10^{-2}$ | 0.777 | 10.89-8.97    |
| HCO <sub>3</sub> <sup>-</sup> | 1 mM                  | 89.71      | $9.70 \times 10^{-3}$ | 0.999 | 10.16-9.01    |
|                               | 5 mM                  | 67.57      | $4.80 \times 10^{-3}$ | 0.991 | 9.64-9.02     |
|                               | 10 mM                 | 63.82      | $4.30 \times 10^{-3}$ | 0.981 | 9.5-9.16      |
| NO <sub>3</sub> <sup>-</sup>  | 1 mM                  | 100.00     | $2.03 \times 10^{-2}$ | 0.993 | 9.86-7.61     |
|                               | 5 mM                  | 100.00     | $1.95 \times 10^{-2}$ | 0.995 | 10.07-7.80    |
|                               | 10 mM                 | 99.35      | $2.09 \times 10^{-2}$ | 0.987 | 10.16-7.88    |
| SO <sub>4</sub> <sup>2-</sup> | 1 mM                  | 99.23      | $2.04 \times 10^{-2}$ | 0.994 | 9.9-7.75      |
|                               | 5 mM                  | 100.00     | $1.94 \times 10^{-2}$ | 0.991 | 10.52-8.33    |
|                               | 10 mM                 | 99.40      | $2.09 \times 10^{-2}$ | 0.974 | 10.28-8.19    |
| HA                            | 5 mg•L <sup>-1</sup>  | 98.62      | $1.79 \times 10^{-2}$ | 0.992 | 9.93-7.56     |
|                               | 20 mg•L <sup>-1</sup> | 96.83      | $1.49 \times 10^{-2}$ | 0.996 | 9.74-7.55     |
|                               | 50 mg•L <sup>-1</sup> | 96.31      | $1.42 \times 10^{-2}$ | 0.993 | 10.4-7.70     |

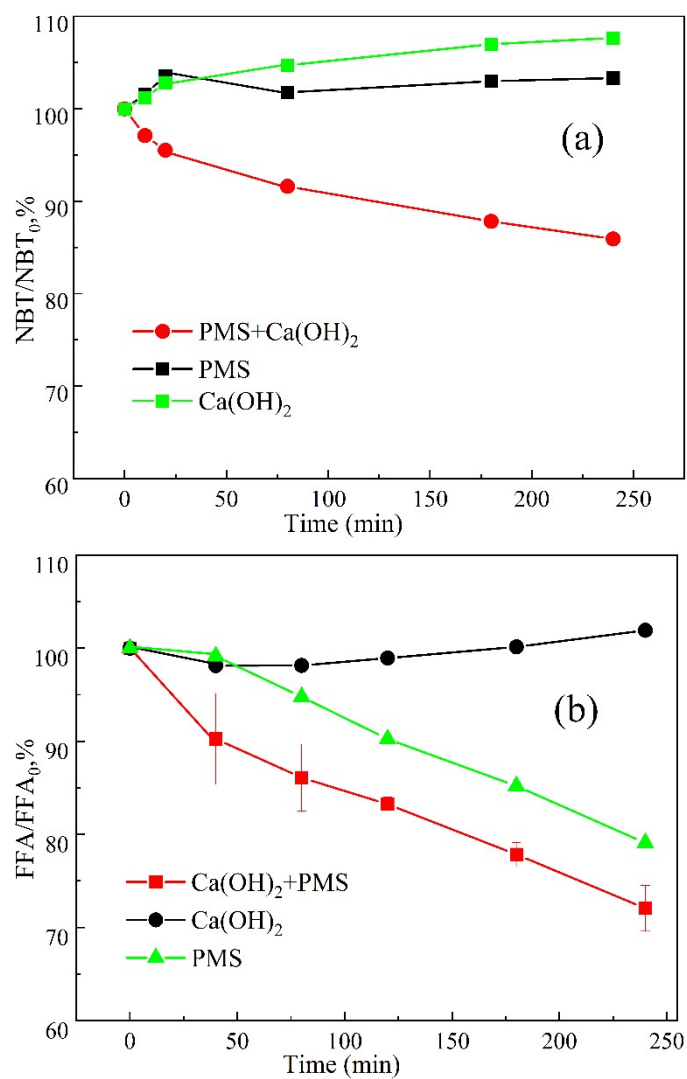

**Fig. S1.** Degradation of NBT (a), and FFA (b) in the Ca(OH)<sub>2</sub>/PMS system,

[Ca(OH)<sub>2</sub>]<sub>0</sub> = 1 mM, [PMS]<sub>0</sub> = 1.5 mM, [NBT]<sub>0</sub> = [FFA]<sub>0</sub> = 20 μM.

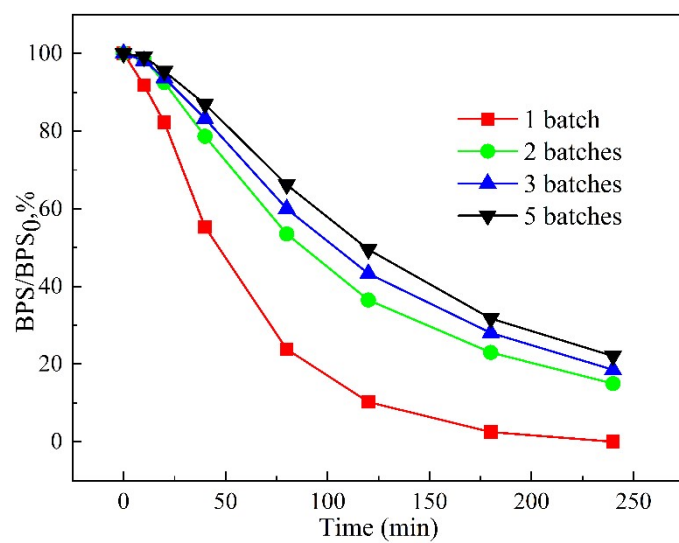

**Fig. S2** Effect of PMS adding modes on the degradation of PMS.  
[Ca(OH)<sub>2</sub>]<sub>0</sub> = 1 mM, [PMS]<sub>0</sub> = 1.5 mM, [BPS]<sub>0</sub> = 20 μM.

Table R1. Removal of BPS by different oxidation methods

| Oxidation methods                                                  | BPS dosages | Experimental conditions                                                                                               | Reaction time | BPS degradation rate | Degradation mechanism                                                                   | References                     |
|--------------------------------------------------------------------|-------------|-----------------------------------------------------------------------------------------------------------------------|---------------|----------------------|-----------------------------------------------------------------------------------------|--------------------------------|
| $\alpha$ -Fe <sub>2</sub> O <sub>3</sub> nanosheets, visible light | 80 $\mu$ M  | 0.2 g•L <sup>-1</sup> catalyst,<br>0.2 g•L <sup>-1</sup> H <sub>2</sub> O <sub>2</sub> ,<br>pH=5.6 $\pm$ 0.2,<br>25°C | 160 min       | 91%                  | h <sup>+</sup> and •OH                                                                  | Shao et al., 2017 <sup>1</sup> |
| Heat, PS                                                           | 25 $\mu$ M  | 0.5 mM PS,<br>pH=7.0, 60°C                                                                                            | 180 min       | 91%                  | SO <sub>4</sub> • <sup>-</sup>                                                          | Wang et al., 2017 <sup>2</sup> |
| Spinel sulfide, PMS                                                | 10 $\mu$ M  | 0.01 g•L <sup>-1</sup> catalyst,<br>0.1 mM PS,<br>25°C                                                                | 30 min        | 100%                 | SO <sub>4</sub> • <sup>-</sup>                                                          | Xu et al., 2018 <sup>3</sup>   |
| Ferrate                                                            | 5 $\mu$ M   | 0.05 mM Ferrate, 25°C                                                                                                 | 10 min        | 90%                  | HFeO <sub>4</sub> <sup>-</sup>                                                          | Yang et al., 2019 <sup>4</sup> |
| visible light, BIOI/B <sub>4</sub> C, PMS                          | 20 $\mu$ M  | 100 mg•L <sup>-1</sup> BIOI/B <sub>4</sub> C,<br>0.05 mM PMS,<br>pH = 7.0 $\pm$ 0.5,<br>25°C                          | 45 min        | 90.4%                | h <sup>+</sup> , •OH,<br>SO <sub>4</sub> • <sup>-</sup> , O <sub>2</sub> • <sup>-</sup> | Lv et al., 2021 <sup>5</sup>   |
| Ca(OH) <sub>2</sub> , PMS                                          | 20 $\mu$ M  | 1.5 mM PMS, 1 mM Ca(OH) <sub>2</sub> ,<br>25°C                                                                        | 240 min       | 100%                 | O <sub>2</sub> • <sup>-</sup> and <sup>1</sup> O <sub>2</sub>                           | Present study                  |

Table R2 The structures and basic properties of BPS.

| Molecular structure                                                               | Molecular formula                                | Molecular weight | Density (g/cm <sup>3</sup> ) | <i>pKa</i> | Melting point (°C) |
|-----------------------------------------------------------------------------------|--------------------------------------------------|------------------|------------------------------|------------|--------------------|
| 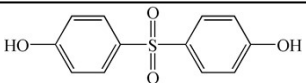 | C <sub>12</sub> H <sub>10</sub> O <sub>4</sub> S | 250.2            | 1.433                        | 8.2        | 240                |



Table R3. Removal of BPS by Ca(OH)<sub>2</sub>/PMS system in the presence of various substances. Experiment conditions: [BPS]<sub>0</sub> = 20 μM, [PMS]<sub>0</sub> = 0-3 mM, [Ca(OH)<sub>2</sub>]<sub>0</sub> = 0-2 mM, [HA]<sub>0</sub> = 0-50 mg•L<sup>-1</sup>.

| Coexisting substance              | Concentration                                      | Removal of BPS(%) | $k_{obs}$ (min <sup>-1</sup> ) | $R^2$ | Initial-final pH |
|-----------------------------------|----------------------------------------------------|-------------------|--------------------------------|-------|------------------|
| <i>different systems</i>          | only PMS                                           | 3.57              | $1.17 \times 10^{-4}$          | 0.742 | 3.96-3.38        |
|                                   | only Ca(OH) <sub>2</sub>                           | 1.05              | $1.74 \times 10^{-5}$          | 0.033 | 11.12-10.97      |
|                                   | PMS+Ca(OH) <sub>2</sub>                            | 100               | $2.01 \times 10^{-2}$          | 0.995 | 9.69-8.20        |
|                                   | PS+Ca(OH) <sub>2</sub>                             | 0                 | $6.64 \times 10^{-5}$          | 0.346 | -                |
|                                   | H <sub>2</sub> O <sub>2</sub> +Ca(OH) <sub>2</sub> | 0                 | $9.88 \times 10^{-5}$          | 0.723 | -                |
| <i>initial Ca(OH)<sub>2</sub></i> | 0.00 mM                                            | 1.05              | $1.17 \times 10^{-4}$          | 0.742 | 3.45-3.26        |
|                                   | 0.25 mM                                            | 3.70              | $1.38 \times 10^{-4}$          | 0.855 | 3.66-3.61        |
|                                   | 0.50 mM                                            | 6.42              | $1.92 \times 10^{-4}$          | 0.652 | 8.03-5.28        |
|                                   | 0.75 mM                                            | 89.32             | $1.01 \times 10^{-2}$          | 0.988 | 9.24-6.06        |
|                                   | 1.00 mM                                            | 100               | $2.01 \times 10^{-2}$          | 0.995 | 9.69-8.20        |
|                                   | 1.50 mM                                            | 82.17             | $7.53 \times 10^{-3}$          | 0.953 | 10.89-10.97      |
|                                   | 2.00 mM                                            | 38.16             | $1.94 \times 10^{-3}$          | 0.852 | 10.96-10.94      |
| <i>initial PMS</i>                | 0.00 mM                                            | 1.05              | $1.74 \times 10^{-5}$          | 0.032 | 11.12-10.97      |
|                                   | 0.50 mM                                            | 12.79             | $5.40 \times 10^{-4}$          | 0.934 | 10.92-10.79      |
|                                   | 1.00 mM                                            | 61.23             | $4.09 \times 10^{-3}$          | 0.978 | 10.41-10.13      |
|                                   | 1.25 mM                                            | 88.03             | $9.27 \times 10^{-3}$          | 0.986 | 10.02-9.31       |
|                                   | 1.50 mM                                            | 100               | $2.01 \times 10^{-2}$          | 0.995 | 9.69-8.20        |
|                                   | 1.75 mM                                            | 98.21             | $1.76 \times 10^{-2}$          | 0.995 | 9.31-8.59        |
|                                   | 2.00 mM                                            | 98.39             | $1.80 \times 10^{-2}$          | 0.993 | 9.14-8.10        |
|                                   | 3.00 mM                                            | 77.63             | $6.87 \times 10^{-3}$          | 0.928 | 7.65-7.50        |
| <i>initial BPS</i>                | 10 μM                                              | 98.74             | $1.79 \times 10^{-2}$          | 0.986 | 9.71-8.70        |
|                                   | 20 μM                                              | 100.00            | $2.01 \times 10^{-2}$          | 0.995 | 9.69-8.20        |
|                                   | 40 μM                                              | 91.94             | $1.14 \times 10^{-2}$          | 0.971 | 10.36-7.85       |
|                                   | 60 μM                                              | 84.63             | $8.60 \times 10^{-3}$          | 0.898 | 9.71-7.23        |
|                                   | 80 μM                                              | 77.08             | $6.60 \times 10^{-3}$          | 0.863 | 9.57-7.21        |
| <i>temperature</i>                | 4°C                                                | 43.12             | $2.40 \times 10^{-3}$          | 0.997 | 10.44-9.44       |
|                                   | 25°C                                               | 100               | $2.01 \times 10^{-2}$          | 0.995 | 9.69-8.20        |
|                                   | 40°C                                               | 100               | $2.11 \times 10^{-2}$          | 0.994 | 9.33-7.24        |
|                                   | 50°C                                               | 100               | $5.92 \times 10^{-2}$          | 0.972 | 9.64-7.43        |

## References:

- 1 X. Wang, J. Ma, H., Z. Wang, R. Guo, and X. Hu, Aqueous phototrans-formation of bisphenol S: The competitive radical-attack pathway to p-hydroxybenzene-sulfonic acid. *Water Sci. Technol.*, 2014, 70(3), 540-547.
- 2 P. Shao, Z. Ren, J. Tian, S. Gao, X. Luo, W. Shi and F. Cui, Silica hydrogel-mediated dissolution-recrystallization strategy for synthesis of ultrathin  $\alpha$ -Fe<sub>2</sub>O<sub>3</sub> nano-sheets with highly exposed (110) facets: A superior photocatalyst for degradation of bisphenol S. *Chem Eng. J.*, 2017, 323, 64-73.
- 3 Q. Wang, X. Lu, Y. Cao, J. Ma, J. Jiang, X. Bai and T. Hu, Degradation of Bisphenol S by heat activated persulfate: Kinetics study, transformation pathways and influences of co-existing chemicals. *Chem Eng. J.*, 2017, 328, 236-245.
- 4 H. Xu, D. Wang, J. Ma, T. Zhang, X. Lu, and Z. Chen, A superior active and stable spinel sulfide for catalytic peroxymonosulfate oxidation of bisphenol S, *Appl. Catal., B*, 2018, 238, 557-567.
- 5 T. Yang, L. Wang, Y. Liu, Z. Huang, H. He, X. Wang, J. Jiang. D. Gao and J. Ma, Comparative study on ferrate oxidation of BPS and BPAF: Kinetics, reaction mechanism, and the improvement on their biodegradability, *Water Res*, 2019, **148**, 115-125.
- 6 Y. Lv, Y. Liu, J. Wei, M. Li, D. Xu and B. Lai, Bisphenol S degradation by visible light assisted peroxymonosulfate process based on BiOI/B<sub>4</sub>C photocatalysts with Z-scheme heterojunction, *Chem Eng. J.*, 2021, 417, 129188.
